# Supplementary material for: Masculinization of Gene Expression Is Associated with Exaggeration of Male Sexual Dimorphism
Source: PubMed Central journal article supplement (PMC3744414; doi:10.1371/journal.pgen.1003697), 2013-08-15

Female

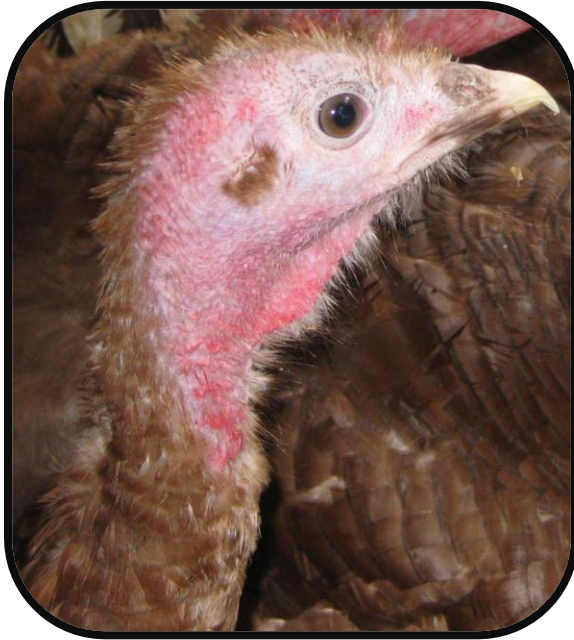

Male

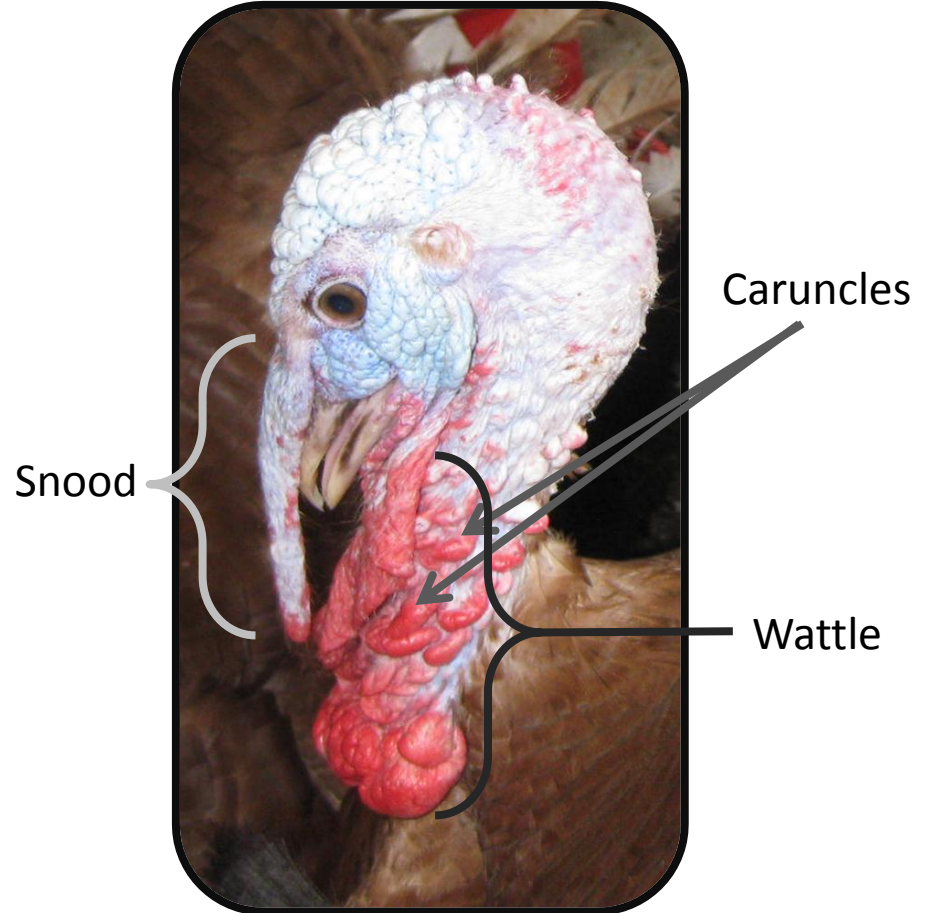

Supplement: pgen.1003697.s001.pdf [file pgen.1003697.s001.pdf]
